# Supplementary material for: STAT3 Is an Upstream Regulator of Granzyme G in the Maternal-To-Zygotic Transition of Mouse Embryos
Source: Int J Mol Sci. 2021 Jan 5;22(1):460. doi: 10.3390/ijms22010460 (PMC7796490; doi:10.3390/ijms22010460)
Supplement: Supplementary file 1 [file ijms-22-00460-s001.pdf]

**Supplementary Table S1.** The designed primer information for PCR amplification of the *granzyme g* promoter deletion constructs in this study

| Primer sets <sup>1</sup> | Oligonucleotide sequence (5'-to-3')             | T <sub>m</sub> (°C) |
|--------------------------|-------------------------------------------------|---------------------|
| Gzmg promoter<br>FL_F    | CGACATGTGAATTTACAACCAGAGTCAT                    | 58                  |
| Gzmg promoter<br>FL_R    | TACTCGAGGAGGGCAGAGCAGACAC                       | 60                  |
| Gzmg promoter<br>Δ1_F    | ACATGTAAGAATGGGCTACATGACTAAT                    | 60                  |
| Gzmg promoter<br>Δ2_F    | ACATGTGCAATACTGTAGGAAATACCAC                    | 60                  |
| Gzmg promoter<br>Δ3_F    | ACATGTCAGAGATAAATGACAATACCCA                    | 60                  |
| Gzmg promoter<br>Δ4_F    | ACATGTTACTGTGGAAC TTTGAGAGTG                    | 60                  |
| ΔStat3mut_F              | TACTTGTGTGCAGCCACTGTCTCAGACCTC<br>CTCAACCACAACC | 84.9                |
| ΔStat3mut_R              | GGTTGTGGTTGAGGAGGTCTGAGACAGTG<br>GCTGCACACAAGTA | 84.9                |

<sup>1</sup>F: forward primer; R: reverse primer

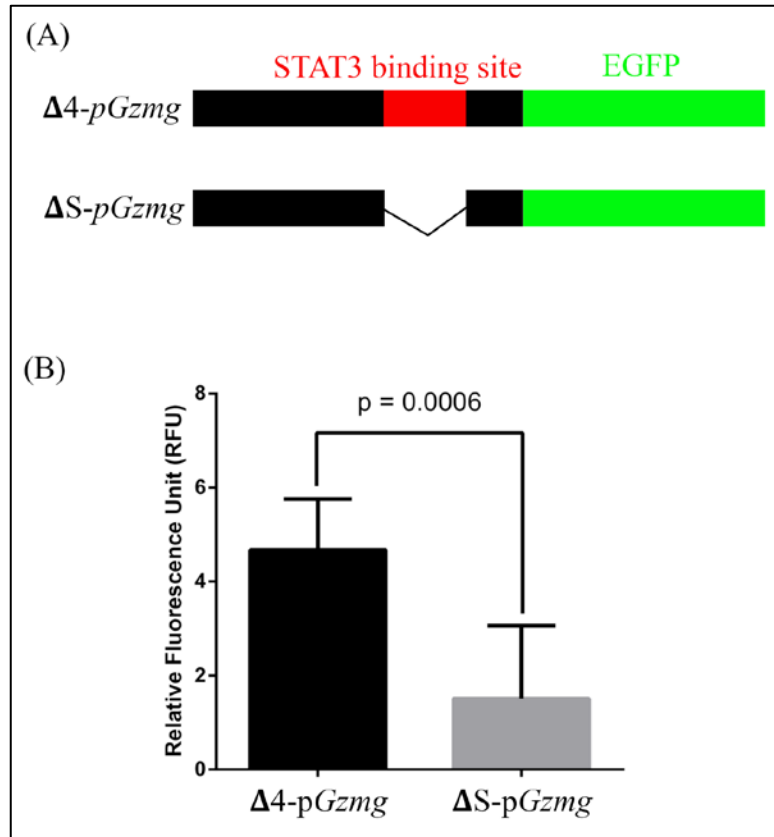

**Supplementary Figure S1.** The transcription activity of *Gzmg* promoter assay between  $\Delta 4$ -pGzmg and  $\Delta S$ -pGzmg in the mouse zygote stage embryos. (A) The  $\Delta S$ -pGzmg plasmid was constructed by a STAT3 binding site deletion from  $\Delta 4$ -pGzmg using the site-direct mutagenesis. (B) Quantitative data of the *Gzmg* promoter assay obtained by the dual fluorescence system. The graph shows the means  $\pm$  SD of at least four replicates for each group of embryos. The *p* value ( $p = 0.0006$ ) indicates a significant difference as determined by Student's *t*-test ( $p < 0.001$ ).

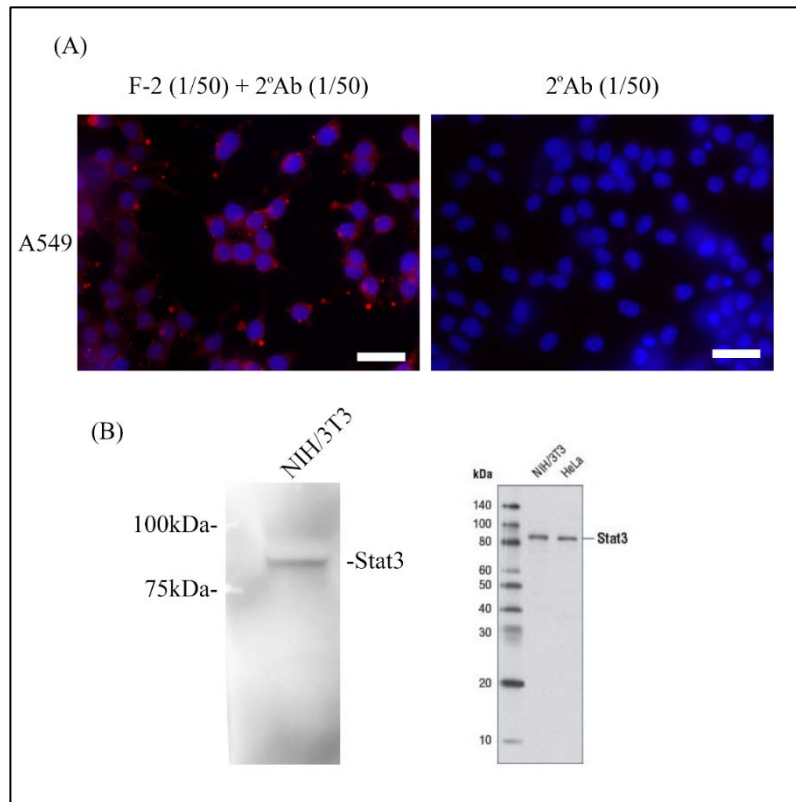

**Supplementary Figure S2.** Specificity test of F-2 monoclonal antibody in the recognition of STAT3 protein. **(A)** Immunofluorescence staining data showed a specific STAT3 signal in the cell cytoplasm and nucleus of A549 cell was recognized by the F-2 antibody compared with a donkey anti-mouse 2oAb (Alexa546; 1/50 dilution) alone group. Nucleus DNA was stained with DAPI to define nuclear localization. Scale bar = 20  $\mu$ m. **(B)** Western blot analysis of F-2 monoclonal antibody specificity for STAT3 protein identification using NIH/3T3 mouse embryonic fibroblast cells. (Left panel) The specific signal of STAT3 recognized by F-2 antibody (1/250 dilution) in Western blot analysis of NIH/3T3 cells. (Right panel) The Stat3 Western blot image is from commercial data sheet for F-2 antibody quality control.
